# Supplementary material for: Development and validation of a nomogram for predicting in-hospital mortality of elderly patients with persistent sepsis-associated acute kidney injury in intensive care units: a retrospective cohort study using the MIMIC-IV database
Source: HighWire-hosted journal article supplement (doi:10.1136/bmjopen-2022-069824), 2023-03-01
Supplement: bmjopen-2022-069824supp001_data_supplement.pdf [file bmjopen-2022-069824supp001_data_supplement.pdf]

Supplemental Table 1

Differences between the training cohort and the validation cohort in terms of demographic characteristics and laboratory values

| Variable                       | Validation cohort<br><i>N</i> =454 | Training cohort<br><i>N</i> =1065 | p.overall |
|--------------------------------|------------------------------------|-----------------------------------|-----------|
| Age (years)                    | 76.0 [71.0;82.0]                   | 76.0 [71.0;83.0]                  | 0.736     |
| Male (n%)                      | 261 (57.5%)                        | 615 (57.7%)                       | 0.971     |
| Weight, kg                     | 78.0 [67.8;93.1]                   | 80.0 [67.7;95.1]                  | 0.540     |
| Height, cm                     | 168 [163;175]                      | 168 [160;175]                     | 0.940     |
| <b>Comorbidities, n%</b>       |                                    |                                   |           |
| Hypertension                   | 188 (41.4%)                        | 434 (40.8%)                       | 0.856     |
| Diabetes                       | 178 (39.2%)                        | 447 (42.0%)                       | 0.344     |
| Chronic heart disease          | 61 (13.4%)                         | 130 (12.2%)                       | 0.564     |
| Cerebrovascular disease        | 68 (15.0%)                         | 168 (15.8%)                       | 0.753     |
| COPD                           | 29 (6.39%)                         | 100 (9.39%)                       | 0.069     |
| Chronic kidney disease         | 210 (46.3%)                        | 505 (47.4%)                       | 0.719     |
| Cancer                         | 73 (16.1%)                         | 173 (16.2%)                       | 0.997     |
| <b>Source of infection, n%</b> |                                    |                                   |           |
| Lung                           | 146 (32.2%)                        | 341 (32.0%)                       | 1.000     |
| Urine                          | 110 (24.2%)                        | 278 (26.1%)                       | 0.482     |
| Blood                          | 190 (41.9%)                        | 427 (40.1%)                       | 0.561     |
| Other(n)                       | 8 (1.76%)                          | 19 (1.78%)                        | 1.000     |
| <b>Vital signs</b>             |                                    |                                   |           |
| Heart rate, bpm                | 84.5 [74.9;94.7]                   | 82.9 [74.1;94.0]                  | 0.336     |
| Respiratory rate, bpm          | 19.2 [17.0;22.1]                   | 19.2 [17.1;22.2]                  | 0.979     |
| Temperature, °C                | 36.8 [36.5;37.1]                   | 36.7 [36.5;37.0]                  | 0.07      |
| Map, mmHg                      | 74.0 [68.0;80.0]                   | 73.2 [68.5;79.8]                  | 0.667     |

|                                       |                  |                  |       |
|---------------------------------------|------------------|------------------|-------|
| SpO <sub>2</sub>                      | 97.3 [95.6;98.6] | 97.3 [95.8;98.6] | 0.398 |
| Basal creatinine level, mg/dL         | 1.35 [0.90;2.40] | 1.40 [0.90;2.30] | 0.980 |
| Creatinine, mg/dL                     | 1.80 [1.30;3.00] | 1.90 [1.30;2.90] | 0.829 |
| AKI KIDGO stage                       |                  |                  | 0.766 |
| 1                                     | 354 (78.0%)      | 812 (76.2%)      |       |
| 2                                     | 49 (10.8%)       | 124 (11.6%)      |       |
| 3                                     | 51 (11.2%)       | 129 (12.1%)      |       |
| Creatinine_48 h                       | 2.10 [1.30;3.60] | 2.20 [1.50;3.60] | 0.383 |
| <b>Laboratory results within 24 h</b> |                  |                  |       |
| Creatinine, mg/dL                     | 2.00 [1.20;3.50] | 2.10 [1.30;3.30] | 0.480 |
| BUN, mg/dL                            | 29.0 [19.0;49.5] | 29.5 [20.0;48.0] | 0.621 |
| Lactate, mmol/L                       | 1.90 [1.35;2.90] | 1.85 [1.35;2.85] | 0.933 |
| PH                                    | 7.37 [7.32;7.42] | 7.37 [7.32;7.42] | 0.700 |
| Hematocrit, g/dL                      | 30.8 [27.4;35.7] | 31.1 [27.1;35.5] | 0.731 |
| Hemoglobin, g/dL                      | 10.2 [9.00;11.8] | 10.2 [8.95;11.8] | 0.647 |
| Platelets, ×10 <sup>9</sup>           | 172 [124;230]    | 174 [124;246]    | 0.580 |
| WBC, ×10 <sup>9</sup>                 | 12.3 [8.42;16.4] | 12.2 [8.75;16.5] | 0.872 |
| Albumin, g/dL                         | 3.00 [2.60;3.50] | 3.00 [2.60;3.50] | 0.595 |
| Sodium, mmol/L                        | 138 [136;141]    | 138 [135;140]    | 0.291 |
| Potassium, mmol/L                     | 4.35 [3.95;4.80] | 4.30 [3.95;4.75] | 0.687 |
| <b>Interventions, n%</b>              |                  |                  |       |
| Furosemide use                        | 97 (21.4%)       | 235 (22.1%)      | 0.815 |
| Dopamine use                          | 29 (6.39%)       | 42 (3.94%)       | 0.053 |
| Norepinephrine use                    | 151 (33.3%)      | 345 (32.4%)      | 0.788 |
| Mechvent use (n%)                     | 343 (75.6%)      | 799 (75.0%)      | 0.879 |
| CRRT use within 48hours               | 17 (3.74%)       | 41 (3.85%)       | 1.000 |
| <b>Score</b>                          |                  |                  |       |

|                               |                  |                  |       |
|-------------------------------|------------------|------------------|-------|
| SOFA score                    | 4.00 [2.00;5.00] | 4.00 [2.00;5.00] | 0.899 |
| GCS score                     | 15.0 [14.0;15.0] | 15.0 [14.0;15.0] | 0.515 |
| APSIII score                  | 64.0 [48.0;85.0] | 65.0 [48.0;86.0] | 0.718 |
| <b>Outcomes</b>               |                  |                  |       |
| Length of ICU Stay, days      | 5.38 [3.00;10.3] | 5.43 [2.86;10.4] | 0.979 |
| Length of Hospital Stay, days | 12.8 [8.09;20.2] | 13.2 [8.61;21.6] | 0.381 |
| ICU mortality (n%)            | 89 (19.6%)       | 174 (16.3%)      | 0.143 |
| Hospital mortality (n%)       | 115 (25.3%)      | 268 (25.2%)      | 0.997 |

COPD, chronic obstructive pulmonary disease; Map, mean arterial pressure; SpO<sub>2</sub>, peripheral oxygen saturation; AKI, acute kidney injury; KIDGO, Kidney Disease Improving Global Outcomes; BUN, Blood Urea Nitrogen; PH, potential of hydrogen; WBC, white blood cell; CRRT, continual renal replacement therapy; SOFA, sequential organ failure assessment; GCS, Glasgow Coma Scale; APSIII, Acute Physiology Score III; ICU, Intensive Care Unit.
